# Supplementary material for: A recombination bin-map identified a major QTL for resistance to Tomato Spotted Wilt Virus in peanut (Arachis hypogaea)
Source: PubMed Central journal article supplement (PMC6890646; doi:10.1038/s41598-019-54747-1), 2019-12-03
Supplement: 41598_2019_54747_MOESM1_ESM.pdf [file 41598_2019_54747_MOESM1_ESM.pdf]

**Supplementary Table S1.** Phenotypic variation of Tomato spotted wilt virus (TSWV) diseases in S-population RILs. Disease severity was measured on a scale of 1 to 10 with 1 signifying the high degree of resistance and 10 signifying the high susceptibility to diseases.

| <b>Trait_month_day_</b><br><b>year</b> | <b>SunOleic</b><br><b>97R</b> | <b>NC</b><br><b>94022</b> | <b>Mean</b> | <b>SD*</b> | <b>CV#</b><br><b>(%)</b> | <b>Min</b> | <b>Max</b> |
|----------------------------------------|-------------------------------|---------------------------|-------------|------------|--------------------------|------------|------------|
| TSWV_2011                              | 3                             | 1.3                       | 2.4         | 0.9        | 37                       | 1          | 5          |
| TSWV_7_24_2013                         | 4.7                           | 1.7                       | 2.8         | 1          | 37.1                     | 1.3        | 5          |
| TSWV_7_24_2013_1                       | 3.3                           | 1.3                       | 2.8         | 1.2        | 43.2                     | 1          | 4          |

\*SD = standard deviation

#CV = coefficient of variation expressed as percentage

**Supplementary Table S2.** Details of major QTLs identified for Tomato spotted wilt virus (TSWV). Genes and SNPs with in the major QTLs identified for TSWV, on chromosome A01 listed. 100 Kb flanking (up- and down-stream) to the QTLs were also scanned to identify the SNPs and genes present surrounding the identified QTLs.

| QTL interval on physical map                     | Gene name           | Chromosome:gene locus | SNP position | Exon/ Intron | SNP (NC 94022/Sun Oleic 97R) | Gene function                                            |
|--------------------------------------------------|---------------------|-----------------------|--------------|--------------|------------------------------|----------------------------------------------------------|
| bin_1_9457148 - bin_1_9546698                    | Aradu.R403Z         | A01:9459385:9461584   | 9459521      | Exon         | T/C                          | Acetyl-CoA synthetase                                    |
|                                                  | Aradu.174XF         | A01:9461623:9464072   | –            | –            | –                            | Unknown protein                                          |
|                                                  | Aradu.N0ICS         | A01:9460399:9465094   | –            | –            | –                            | Receptor-like protein kinase (Leucine-rich repeat)       |
|                                                  | Aradu.HA9JS         | A01:9472535:9479133   | –            | –            | –                            | Strictosidine synthase 1-like                            |
|                                                  | Aradu.R03U5         | A01:9480229:9482635   | –            | –            | –                            | Cytochrome C oxidase assembly protein                    |
|                                                  | Aradu.A2Q98         | A01:9466297:9468320   | –            | –            | –                            | Strictosidine synthase 1-like                            |
|                                                  | Aradu.Y2B0V         | A01:9512238:9512927   | –            | –            | –                            | Unknown protein                                          |
|                                                  | Aradu.118NW         | A01:9504106:9506604   | –            | –            | –                            | Chitinase family protein                                 |
|                                                  | Aradu.A2QA1         | A01:9483590:9488632   | –            | –            | –                            | Chitinase family protein                                 |
|                                                  | Aradu.Q1JIJ         | A01:9496202:9499423   | –            | –            | –                            | Tripeptidyl-peptidase 2-like isoform X1                  |
|                                                  | Aradu.JL35E         | A01:9526513:9530482   | 9530252      | Exon         | A/G                          | UV radiation resistance-associated-like protein          |
|                                                  | Aradu.W9S3JN        | A01:9522348:9524790   | –            | –            | –                            | Chitinase family protein                                 |
|                                                  | Aradu.8N0H3         | A01:9533696:9534990   | –            | –            | –                            | Chitinase family protein                                 |
| Aradu.G6HPF                                      | A01:9519501:9520406 | –                     | –            | –            | Unknown protein              |                                                          |
| 100 Kb flanking to bin_1_9457148 - bin_1_9546698 | Aradu.9AI6Q         | A01:9562382:9564402   | 9563144      | Intron       | C/T                          | Chitinase family protein                                 |
|                                                  | Aradu.XH3ZX         | A01:9589707:9592075   | 9589841      | Exon         | T/C                          | Regulator of Vps4 activity in the MVB pathway protein    |
|                                                  | Aradu.XH3ZX         | A01:9589707:9592075   | 9589926      | Exon         | T/G                          | Regulator of Vps4 activity in the MVB pathway protein    |
|                                                  | Aradu.75IX3         | A01:9646248:9649054   | 9647526      | Exon         | C/T                          | serine/threonine-protein phosphatase 7 long form homolog |
|                                                  | Aradu.5D88D         | A01:9594974:9602683   | 9599954      | Intron       | T/C                          | GDSL-like Lipase/Acylhydrolase superfamily protein       |
|                                                  | Aradu.X971L         | A01:9574283:9586995   | 9574939      | Exon         | A/T                          | Uncharacterized protein                                  |
| Aradu.X971L                                      | A01:9574283:9586995 | 9585154               | Intron       | A/G          | Uncharacterized protein      |                                                          |

**Supplementary Table S3.** List of primer sequences for KASP assay of SNPs developed and validated for tomato spotted wilt virus (TSWV).

| <b>ID</b>   | <b>Primer_Allele FAM</b>           | <b>Primer_Allele HEX</b>        | <b>Primer_Common</b>               | <b>Allele FAM</b> | <b>Allele HEX</b> |
|-------------|------------------------------------|---------------------------------|------------------------------------|-------------------|-------------------|
| A01_9192862 | GTACTTAATGGATGGGAGGAATCGA          | ACTTAATGGATGGGAGGAATCGG         | TTGCATCTTGAAGTATCTGTGAGTCA<br>GAT  | A                 | G                 |
| A01_9604392 | ATAAATTATAGTTGGCTCGTTGCCAA<br>TATA | AATTATAGTTGGCTCGTTGCCAAT<br>ATG | CCTAATCCCGATTCCCAAATTTCCAA<br>TAT  | A                 | G                 |
| A01_9530252 | CAGCTTTTGAACATGCTGTCCTCTA          | AGCTTTTGAACATGCTGTCCTCTG        | CATCTGGCTAAAGTATGTTCTTGTGTT<br>CTT | A                 | G                 |

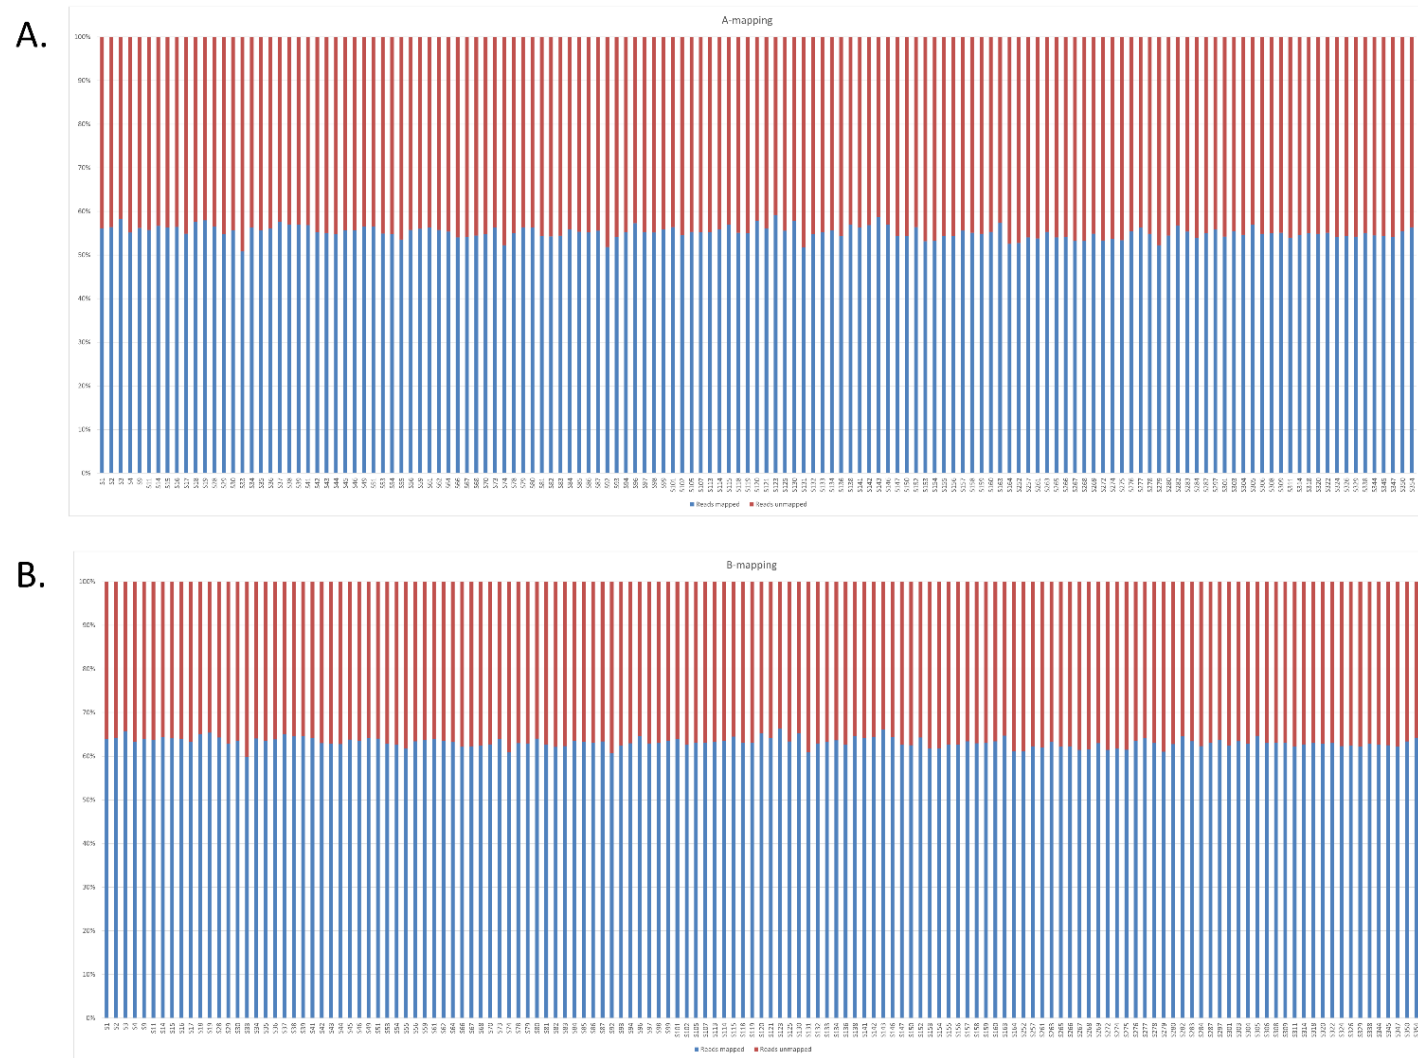

**Figure S1.** Mapping of reads on A- and B-genomes of peanut: reads mapped in blue and unmapped in red.
